# Supplementary material
Source: publisher figshare collection journal article supplement (https://asha.figshare.com/articles/dataset/_/13022471)
Supplement: Supplementary file 2 [file 1]

## **Supplemental Material S1. Invitation to participate.**

Hello! My name is Jeni Montzka and I am part of the Child Language Lab at Idaho State University (ISU). We would like to invite you to participate in a research study about child language assessment. It will take about 15 minutes to answer approximately 25 basic survey questions that focus on which language tests you use and which factors influence your decisions to use them. The survey also includes some demographic questions. If you choose to, you may answer additional questions.

We are not collecting any personally identifying information in this survey. All information will be kept for analysis for five years or until manuscripts have been accepted for publication. Participation is voluntary and you are free to discontinue at any time. After clicking on the link below to begin the survey, you will be given a question that indicates your consent to participate in this study.

This Survey is only for SLPs who spend more than 40% of their work time in the school setting. SLP assistants are not eligible to participate in this survey.

If you have any questions about the research, please contact me through Facebook or the ISU-Meridian Child Language Lab at [langlab@isu.edu](mailto:langlab@isu.edu) prior to starting the survey.

Thank you in advance for your participation!

To begin, please click on the following link:

[https://isudhs.az1.qualtrics.com/SE/?SID=SV\\_3ydURd47aDMRjHn](https://isudhs.az1.qualtrics.com/SE/?SID=SV_3ydURd47aDMRjHn)
